# Supplementary material
Source: Elsevier journal article supplement (https://www.sciencedirect.com/science/article/pii/S1885585717305492)
Supplement: mmc1 [file S1885585717305492:mmc1.pdf]

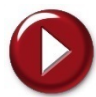

## **Supplementary material**

---

### **Diastolic Function Is Impaired in Patients With Prehypertension: Data From the EPIPorto Study**

---

**Table of the supplementary material.** Comparison of Diastolic Function Classification Using the 2016 Joint Recommendations and the 2017 Clinically-oriented Algorithm With the Previous 2009 Joint Recommendations

|                                           | EACVI/ASE 2016 recommendations |               |            |  | 2017 clinically-oriented algorithm |            |
|-------------------------------------------|--------------------------------|---------------|------------|--|------------------------------------|------------|
|                                           | No DD                          | Indeterminate | DD present |  | No DD                              | DD present |
| <i>EACVI/ASE 2009 Recommendations</i>     |                                |               |            |  |                                    |            |
| No DD                                     | 656                            | 63            | 2          |  | 471                                | 251        |
| DD present                                | 127                            | 71            | 6          |  | 0                                  | 203        |
|                                           |                                |               |            |  |                                    |            |
| <i>2017 clinically-oriented algorithm</i> |                                |               |            |  |                                    |            |
| No DD                                     | 461                            | 9             | 0          |  | -                                  | -          |
| DD present                                | 322                            | 125           | 8          |  | -                                  | -          |

DD, diastolic dysfunction; EACVI/ASE, European Association of Cardiovascular Imaging/American Society of Echocardiography.
